# Supplementary material for: Citrus limonL.-Derived Nanovesicles Show an Inhibitory Effect on Cell Growth in p53-Inactivated Colorectal Cancer Cells via the Macropinocytosis Pathway
Source: MDPI journal article supplement (doi:10.3390/biomedicines10061352), 2022-06-08
Supplement: s1 [file s1]

## Article

# Supplementary Materials: *Citrus limon L.*-derived nanovesicles show an inhibitory effect on cell growth in p53-inactivated colorectal cancer cells via the macropinocytosis pathway

Hideki Takakura <sup>1,2,3</sup>, Toshimasa Nakao <sup>1</sup>, Takumi Narita <sup>1</sup> Mano Horinaka <sup>1,2</sup>, Yukako Nakao-Ise <sup>1</sup>, Tetsushi Yamamoto <sup>4</sup>, Yosuke Iizumi <sup>1</sup>, Motoki Watanabe <sup>1</sup>, Yoshihiro Sowa <sup>1</sup>, Keisuke Oda <sup>3</sup>, Nobuhiro Mori <sup>3</sup>, Toshiyuki Sakai <sup>1,2</sup> and Michihiro Mutoh <sup>1\*</sup>

<sup>1</sup> Department of Molecular-Targeting Prevention, Kyoto Prefectural University of Medicine, Kyoto 602-8566, Japan; toshi876@koto.kpu-m.ac.jp (T.N.); narita@koto.kpu-m.ac.jp (T.N.); nakaoy@koto.kpu-m.ac.jp (Y.N.-I.); yizumi@koto.kpu-m.ac.jp (Y.I.); mtkw@koto.kpu-m.ac.jp (M.W.); ysowa@koto.kpu-m.ac.jp (Y.S.); mimutoh@koto.kpu-m.ac.jp (M.M.)

<sup>2</sup> Department of Drug Discovery Medicine, Kyoto Prefectural University of Medicine, Kyoto 602-8566, Japan; m-hori@koto.kpu-m.ac.jp (M.H.); tsakai@koto.kpu-m.ac.jp (T.S.)

<sup>3</sup> Laboratory of Biopharmaceutics and Pharmacokinetics, Faculty of Pharmaceutical Sciences, Hiroshima International University, Hiroshima 737-0112, Japan; takakura@hirokoku-u.ac.jp (H.T.); oda@hirokoku-u.ac.jp (K.O.); n-mori@hirokoku-u.ac.jp (N.M.)

<sup>4</sup> Pathological and Biomolecule Analyses Laboratory, Faculty of Pharmacy, Kindai University, Osaka 577-8502, Japan; yamatetsu@phar.kindai.ac.jp (T.Y.)

\* Correspondence: mimutoh@koto.kpu-m.ac.jp; Tel.: + 81 75 251 5539

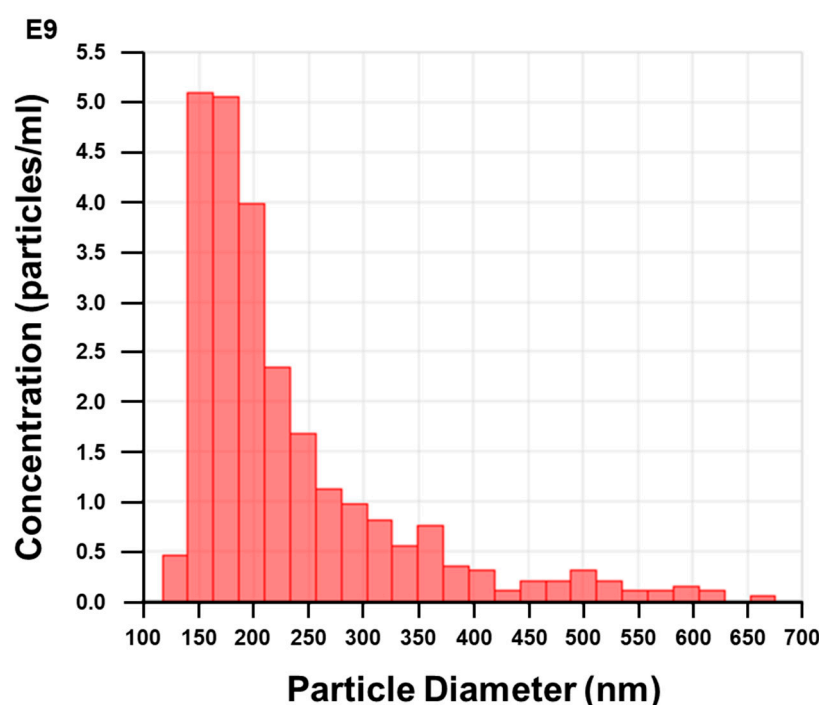

**Figure S1.** Analysis of the diameter and concentration for *Citrus limon L.*-derived nanovesicles by tunable resistive pulse sensing.

**Table S1.** *Citrus limon L.*-derived nanovesicle concentration by tunable resistive pulse sensing.

| Particle concentration             |
|------------------------------------|
| $2.50 \times 10^{10}$ particles/ml |

$2.50 \times 10^{10}$ : the total number of digits is 11, and the first three digits are "250".
